# Supplementary material for: Étude par microscopie à effet tunnel à basse température de l'adsorption moléculaire sur Ag(111) : de la molécule unique aux assemblages complexes
Source: Royal Society of Chemistry journal article supplement (doi:10.1039/c9ra00856j), 2010-01-01
Supplement: c9ra00856j1.pdf [file c9ra00856j1.pdf]

## Hydrogen bonding capabilities of group 14 homologues of HCN and HNC

Joanatan M. Bautista-Renedo, Horacio Reyes-Pérez, Erick Cuevas-Yáñez,  
Carlos Barrera-Díaz, Nelly González-Rivas and Joel Ireta

email: [nelymagr@gmail.com](mailto:nelymagr@gmail.com)

### Energies and coordinates of the calculated dimers

#### (HCN)<sub>2</sub> dimer

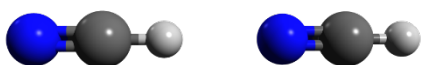

```
E(BSSE Corrected MP2/aug-cc-pVDZ//CCSD(T)/aug-cc-pVQZ) = -186.6117560 Ha
H 0.0000000000 0.0000000000 -3.7949516300
C 0.0000000000 0.0000000000 -2.7180143800
N 0.0000000000 0.0000000000 -1.5386830800
H 0.0000000000 0.0000000000 0.6078420000
C 0.0000000000 0.0000000000 1.6916814900
N 0.0000000000 0.0000000000 2.8736983500
```

#### (HSiN)<sub>2</sub> dimer

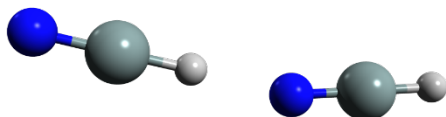

```
E(BSSE Corrected MP2/aug-cc-pVDZ//CCSD(T)/aug-cc-pVQZ) = -688.4614417 Ha
Si -0.3510000000 -3.0730000000 0.0000000000
Si 0.2940000000 2.1770000000 0.0000000000
N -0.4850000000 -1.4430000000 0.0000000000
N 0.6290000000 3.7850000000 0.0000000000
H -0.2200000000 -4.5570000000 0.0000000000
H 0.0000000000 0.7090000000 0.0000000000
```

#### (HGeN)<sub>2</sub> dimer

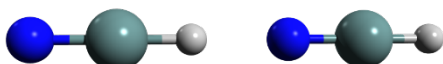

```
E(BSSE Corrected MP2/aug-cc-pVDZ//CCSD(T)/aug-cc-pVQZ) = -4261.662058 Ha
H 0.0000000000 0.0000000000 4.4462977100
Ge 0.0000000000 0.0000000000 2.9214801200
N 0.0000000000 0.0000000000 1.2235170700
```

H 0.0000000000 0.0000000000 -0.8692058500  
 Ge 0.0000000000 0.0000000000 -2.4016481400  
 N 0.0000000000 0.0000000000 -4.1109049800

**(HSnN)<sub>2</sub> dimer**

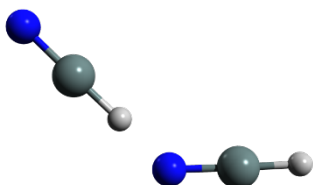

E(BSSE Corrected MP2/aug-cc-pVDZ//CCSD(T)/aug-cc-pVQZ) = -537.4864554 Ha  
 Sn 1.1670000000 2.0560000000 0.0000000000  
 Sn -1.3010000000 -2.3960000000 0.0000000000  
 N 2.4900000000 3.4180000000 0.0000000000  
 N -1.3590000000 -0.5300000000 0.0000000000  
 H 0.0000000000 0.8150000000 0.0000000000  
 H -1.2150000000 -4.0630000000 0.0000000000

**(HNC)<sub>2</sub> dimer**

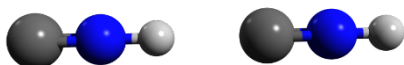

E(BSSE Corrected MP2/aug-cc-pVDZ//CCSD(T)/aug-cc-pVQZ) = -186.5695365 Ha  
 H 0.0000000000 0.0000000000 3.5618994900  
 N 0.0000000000 0.0000000000 2.5557680100  
 C 0.0000000000 0.0000000000 1.3698327800  
 H 0.0000000000 0.0000000000 -0.6594665500  
 N 0.0000000000 0.0000000000 -1.6823277500  
 C 0.0000000000 0.0000000000 -2.8725852400

**(HNSi)<sub>2</sub> dimer**

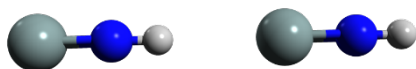

E(BSSE Corrected MP2/aug-cc-pVDZ//CCSD(T)/aug-cc-pVQZ) = -688.6733033 Ha  
 H 0.0000000000 0.0000000000 -4.6679536400  
 N 0.0000000000 0.0000000000 -3.6572584400  
 Si 0.0000000000 0.0000000000 -2.0691857000  
 H 0.0000000000 0.0000000000 0.7142637600  
 N 0.0000000000 0.0000000000 1.7260077000  
 Si 0.0000000000 0.0000000000 3.3172175000

**(HNGe)<sub>2</sub> dimer**

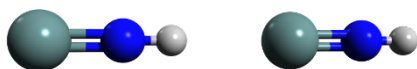

E(BSSE Corrected MP2/aug-cc-pVDZ//CCSD(T)/aug-cc-pVQZ) = -4261.8605290 Ha  
 H 0.0000000000 0.0000000000 -4.9943781800  
 N 0.0000000000 0.0000000000 -3.9804115500

|    |              |              |               |
|----|--------------|--------------|---------------|
| Ge | 0.0000000000 | 0.0000000000 | -2.3017368100 |
| H  | 0.0000000000 | 0.0000000000 | 0.3265298500  |
| N  | 0.0000000000 | 0.0000000000 | 1.3417870800  |
| Ge | 0.0000000000 | 0.0000000000 | 3.0248061800  |

**(HNSn)<sub>2</sub> dimer**

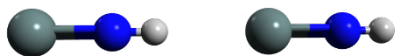

E(BSSE Corrected MP2/aug-cc-pVDZ//CCSD(T)/aug-cc-pVQZ) = -537.6974426 Ha

|    |              |              |               |
|----|--------------|--------------|---------------|
| H  | 0.0000000000 | 0.0000000000 | -5.5081804700 |
| N  | 0.0000000000 | 0.0000000000 | -4.4891063400 |
| Sn | 0.0000000000 | 0.0000000000 | -2.5971742100 |
| H  | 0.0000000000 | 0.0000000000 | 0.2392024100  |
| N  | 0.0000000000 | 0.0000000000 | 1.2584780000  |
| Sn | 0.0000000000 | 0.0000000000 | 3.1548417400  |

**(HN Pb)<sub>2</sub> dimer**

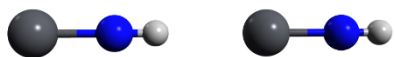

E(BSSE Corrected MP2/aug-cc-pVDZ//CCSD(T)/aug-cc-pVQZ) = -494.8606690 Ha

|    |              |              |               |
|----|--------------|--------------|---------------|
| H  | 0.0000000000 | 0.0000000000 | -5.7554648500 |
| N  | 0.0000000000 | 0.0000000000 | -4.7316109000 |
| Pb | 0.0000000000 | 0.0000000000 | -2.7409907800 |
| H  | 0.0000000000 | 0.0000000000 | 0.0991947000  |
| N  | 0.0000000000 | 0.0000000000 | 1.1222635600  |
| Pb | 0.0000000000 | 0.0000000000 | 3.1180847000  |
